# Supplementary material for: Simulations of infrared and Raman spectra in solution using the fragment molecular orbital method
Source: Royal Society of Chemistry journal article supplement (doi:10.1039/c9cp00940j), 2019-01-01
Supplement: c9cp00940j1.pdf [file c9cp00940j1.pdf]

# Supplemental information for Simulations of infrared and Raman spectra in solution using the fragment molecular orbital method

Hiroya Nakata<sup>a</sup>, Dmitri G. Fedorov<sup>b</sup>

<sup>a</sup> e-mail: nakata.hiro07@gmail.com R & D Center Kagoshima, Kyocera,  
1-4 Kokubu Yamashita-cho, Kirishima-shi, Kagoshima, 899-4312, Japan

<sup>b</sup> CD-FMat, National Institute of Advanced Industrial Science and Technology (AIST),  
1-1-1 Umezono, Tsukuba, Ibaraki 305-8568, Japan

May 18, 2019

## 1 Description

Here, some details of derivations and additional results are provided.

## 2 Derivative of Energy with respect to a nuclear coordinate

The total energy for PCM without fragmentation is [1]

$$E = 2 \sum_i^{\text{occ}} h_{ii} + \sum_i^{\text{occ}} \sum_j^{\text{occ}} [2(ii|jj) - (ij|ij)] + E_{\text{NR}} + \frac{1}{2} \sum_t^{N_{\text{TS}}} q_t V_t. \quad (1)$$

The derivative of the energy with respect to a nuclear coordinate is

$$\frac{\partial E}{\partial a} = 2 \sum_i^{\text{occ}} h_{ii}^a + \sum_i^{\text{occ}} \sum_j^{\text{occ}} [2(ii|jj)^a - (ij|ij)^a] + \sum_m^{\text{all}} \sum_i^{\text{occ}} 4U_{mi}^a F_{mi} + E_{\text{NR}}^a + \frac{1}{2} \sum_t^{N_{\text{TS}}} \frac{\partial (q_t V_t)}{\partial a}. \quad (2)$$

The derivative of PCM specific term  $W = \mathbf{V} \cdot \mathbf{q}/2$  is

$$\begin{aligned} \frac{\partial W}{\partial a} &= \frac{1}{2} \sum_t^{N_{\text{TS}}} \left[ q_t \frac{\partial (V_t)}{\partial a} + V_t \frac{\partial (q_t)}{\partial a} \right] \\ &= V_{\text{NR}}^a + \sum_{\mu, \nu} D_{\mu\nu} W_{\mu\nu}^a + 4 \sum_m^{\text{all}} \sum_i^{\text{occ}} U_{mi}^a W_{mi} + \sum_{t,s}^{N_{\text{TS}}} q_t \frac{\partial C_{ts}}{\partial a} q_s, \end{aligned} \quad (3)$$

$$W_{\mu\nu}^a = \sum_t^{N_{\text{TS}}} q_t \left\langle \mu \left| \frac{-1}{|\mathbf{r} - \mathbf{R}_t|} \right| \nu \right\rangle^a \quad (4)$$

$$W_{mi} = \sum_t^{N_{\text{TS}}} q_t \left\langle m \left| \frac{-1}{|\mathbf{r} - \mathbf{R}_t|} \right| i \right\rangle \quad (5)$$

$$V_{\text{NR}}^a = \sum_t^{N_{\text{TS}}} \sum_A q_t \frac{\partial}{\partial a} \left( \frac{Z_A}{|\mathbf{R}_A - \mathbf{R}_t|} \right). \quad (6)$$

Therefore, the derivative of the energy is

$$\begin{aligned} \frac{\partial E}{\partial a} &= 2 \sum_i^{\text{occ}} h_{ii}^a + \sum_i^{\text{occ}} \sum_j^{\text{occ}} [2(ii|jj)^a - (ij|ij)^a] - \sum_i^{\text{occ}} \sum_j^{\text{occ}} 2S_{ij}^a \tilde{F}_{ij} + E_{\text{NR}}^a \\ &\quad + V_{\text{NR}}^a + \sum_{\mu, \nu} D_{\mu\nu} W_{\mu\nu}^a + \frac{1}{2} \sum_{t,s}^{N_{\text{TS}}} q_t \frac{\partial C_{ts}}{\partial a} q_s. \end{aligned} \quad (7)$$

### 3 Second order derivative of the energy

$$\begin{aligned} \frac{\partial^2 E}{\partial a \partial b} &= 2 \sum_i^{\text{occ}} h_{ii}^{ab} + \sum_i^{\text{occ}} \sum_j^{\text{occ}} [2(ii|jj)^{ab} - (ij|ij)^{ab}] + \sum_m^{\text{all}} \sum_i^{\text{occ}} 4U_{mi}^b F_{mi}^a \\ &\quad - \sum_i^{\text{occ}} \sum_j^{\text{occ}} 2S_{ij}^{ab} \tilde{F}_{ij} - \sum_m^{\text{all}} \sum_i^{\text{occ}} \sum_j^{\text{occ}} 4U_{mi}^b S_{mj}^a \tilde{F}_{ij} - \sum_i^{\text{occ}} \sum_j^{\text{occ}} 2S_{ij}^a \frac{\partial \tilde{F}_{ij}}{\partial b} + E_{\text{NR}}^{ab} \\ &\quad + \frac{\partial (V_{\text{NR}}^a)}{\partial b} + \sum_m^{\text{all}} \sum_i^{\text{occ}} 4U_{mi}^b W_{mi}^a + \sum_{\mu, \nu} D_{\mu\nu} \frac{\partial W_{\mu\nu}^a}{\partial b} + \frac{1}{2} \sum_{t,s}^{N_{\text{TS}}} \frac{\partial}{\partial b} \left( q_t \frac{\partial C_{ts}}{\partial a} q_s \right). \end{aligned} \quad (8)$$

The derivative of the Fock matrix is

$$\frac{\partial \tilde{F}_{ij}}{\partial b} = F_{ij}^b + \frac{\partial F_{ij}}{\partial b} + \frac{\partial W_{ij}}{\partial b} \quad (9)$$

$$\frac{\partial F_{ij}}{\partial b} = h_{ij}^b + \sum_k^{\text{occ}} [2(ij|kk) - (ik|jk)]^b + \sum_m^{\text{all}} U_{mj}^b F_{mi} + \sum_m^{\text{all}} U_{mi}^b F_{mj} + \sum_k^{\text{all}} \sum_l^{\text{occ}} U_{kl}^b A_{ij,kl} \quad (10)$$

$$\begin{aligned} \frac{\partial W_{ij}}{\partial b} &= \sum_m^{\text{all}} U_{mi}^b W_{mj} + \sum_m^{\text{all}} U_{mi}^b W_{mj} + W_{ij}^b + \sum_t^{N_{\text{TS}}} \frac{\partial q_t}{\partial b} \left\langle i \left| \frac{-1}{|\mathbf{r} - \mathbf{R}_t|} \right| j \right\rangle \\ &= \sum_m^{\text{all}} U_{mi}^b W_{mj} + \sum_m^{\text{all}} U_{mi}^b W_{mj} + W_{ij}^b - \sum_{t,s}^{N_{\text{TS}}} \sum_A C_{ts}^{-1} \left( \frac{Z_A}{|\mathbf{R}_A - \mathbf{R}_s|} \right)^b \left\langle i \left| \frac{-1}{|\mathbf{r} - \mathbf{R}_t|} \right| j \right\rangle \\ &\quad - \sum_{\mu,\nu} \sum_{t,s}^{N_{\text{TS}}} D_{\mu\nu} C_{ts}^{-1} \left\langle \mu \left| \frac{-1}{|\mathbf{r} - \mathbf{R}_s|} \right| \nu \right\rangle^b \left\langle i \left| \frac{-1}{|\mathbf{r} - \mathbf{R}_t|} \right| j \right\rangle \\ &\quad + \sum_k^{\text{all}} \sum_l^{\text{occ}} U_{kl}^b A_{ij,kl}^{\text{PCM}} - \sum_{s,t,u}^{N_{\text{TS}}} q_s \frac{\partial C_{su}}{\partial b} C_{ut}^{-1} \left\langle i \left| \frac{-1}{|\mathbf{r} - \mathbf{R}_t|} \right| j \right\rangle \end{aligned} \quad (11)$$

$$A_{ij,kl}^{\text{PCM}} = 4 \sum_{t,s}^{N_{\text{TS}}} C_{ts}^{-1} \left\langle k \left| \frac{-1}{|\mathbf{r} - \mathbf{R}_s|} \right| l \right\rangle \left\langle i \left| \frac{-1}{|\mathbf{r} - \mathbf{R}_t|} \right| j \right\rangle, \quad (12)$$

the derivative of  $V_{\text{NR}}^a$  is

$$\begin{aligned} \frac{\partial V_{\text{NR}}^a}{\partial b} &= - \sum_m^{\text{all}} \sum_i^{\text{occ}} \sum_{t,s}^{N_{\text{TS}}} \sum_A 4 C_{ts}^{-1} U_{mi}^b \left\langle m \left| \frac{-1}{|\mathbf{r} - \mathbf{R}_s|} \right| i \right\rangle \frac{\partial}{\partial a} \left( \frac{Z_A}{|\mathbf{R}_A - \mathbf{R}_t|} \right) \\ &\quad - \sum_{\mu,\nu} \sum_{t,s}^{N_{\text{TS}}} \sum_A C_{ts}^{-1} D_{\mu\nu} \left\langle \mu \left| \frac{-1}{|\mathbf{r} - \mathbf{R}_s|} \right| \nu \right\rangle^b \frac{\partial}{\partial a} \left( \frac{Z_A}{|\mathbf{R}_A - \mathbf{R}_t|} \right) \\ &\quad - \sum_{\mu,\nu} \sum_{t,s}^{N_{\text{TS}}} \sum_{A,B} C_{ts}^{-1} \frac{\partial}{\partial b} \left( \frac{Z_B}{|\mathbf{R}_B - \mathbf{R}_s|} \right) \frac{\partial}{\partial a} \left( \frac{Z_A}{|\mathbf{R}_A - \mathbf{R}_t|} \right) \\ &\quad + \sum_{t,s}^{N_{\text{TS}}} \sum_A q_t \frac{\partial^2}{\partial a \partial b} \left( \frac{Z_A}{|\mathbf{R}_A - \mathbf{R}_t|} \right) - \sum_{s,t,u}^{N_{\text{TS}}} q_s \frac{\partial C_{su}}{\partial b} C_{ut}^{-1} \frac{\partial}{\partial a} \left( \frac{Z_A}{|\mathbf{R}_A - \mathbf{R}_t|} \right), \end{aligned} \quad (13)$$

and the derivative of  $W_{\mu\nu}^a$  is

$$\begin{aligned}
\frac{\partial W_{\mu\nu}^a}{\partial b} &= \sum_t^{N_{\text{TS}}} \frac{\partial q_t}{\partial b} \left\langle \mu \left| \frac{-1}{|\mathbf{r} - \mathbf{R}_t|} \right| \nu \right\rangle^a + \sum_t^{N_{\text{TS}}} q_t \left\langle \mu \left| \frac{-1}{|\mathbf{r} - \mathbf{R}_t|} \right| \nu \right\rangle^{ab} \\
&= - \sum_{t,s}^{N_{\text{TS}}} \sum_{\lambda,\sigma} C_{ts}^{-1} D_{\lambda\sigma} \left\langle \lambda \left| \frac{-1}{|\mathbf{r} - \mathbf{R}_s|} \right| \sigma \right\rangle^b \left\langle \mu \left| \frac{-1}{|\mathbf{r} - \mathbf{R}_t|} \right| \nu \right\rangle^a \\
&\quad - 4 \sum_{t,s}^{N_{\text{TS}}} \sum_m^{\text{all}} \sum_i^{\text{occ}} C_{ts}^{-1} U_{mi}^b \left\langle m \left| \frac{-1}{|\mathbf{r} - \mathbf{R}_s|} \right| i \right\rangle \left\langle \mu \left| \frac{-1}{|\mathbf{r} - \mathbf{R}_t|} \right| \nu \right\rangle^a \\
&\quad - \sum_{t,s}^{N_{\text{TS}}} \sum_B C_{ts}^{-1} \frac{\partial}{\partial b} \left( \frac{Z_B}{|\mathbf{R}_B - \mathbf{R}_t|} \right) \left\langle \mu \left| \frac{-1}{|\mathbf{r} - \mathbf{R}_t|} \right| \nu \right\rangle^a \\
&\quad + \sum_t^{N_{\text{TS}}} q_t \left\langle \mu \left| \frac{-1}{|\mathbf{r} - \mathbf{R}_t|} \right| \nu \right\rangle^{ab} - \sum_{s,t,u}^{N_{\text{TS}}} q_s \frac{\partial C_{su}}{\partial b} C_{ut}^{-1} \left\langle \mu \left| \frac{-1}{|\mathbf{r} - \mathbf{R}_t|} \right| \nu \right\rangle^a. \tag{14}
\end{aligned}$$

Therefore, the second order derivative of the energy is

$$\begin{aligned}
\frac{\partial^2 E}{\partial a \partial b} &= \sum_i^{\text{occ}} \left[ h_{ii}^{ab} + F_{ii}^{ab} - S_{ii}^{ab} \epsilon_i \right] + E_{\text{NR}}^{ab} + \sum_i^{\text{occ}} \sum_j^{\text{occ}} 4 S_{ij}^b S_{ij}^a \epsilon_i \\
&\quad + \sum_m^{\text{vir}} \sum_i^{\text{occ}} U_{mi}^b \left[ 4 F_{mi}^a + 4 W_{mi}^a - 4 S_{mi}^a \epsilon_i - 2 \sum_k^{\text{occ}} \sum_l^{\text{occ}} S_{kl}^a A_{mi,kl} \right] \\
&\quad - \sum_i^{\text{occ}} \sum_j^{\text{occ}} S_{ij}^b \left[ 2 F_{ij}^a + 2 W_{ij}^a - \frac{1}{2} \sum_k^{\text{occ}} \sum_l^{\text{occ}} S_{kl}^b A_{ij,kl} \right] \\
&\quad - \sum_i^{\text{occ}} \sum_j^{\text{occ}} S_{ij}^a \left[ 2 F_{ij}^b - \frac{1}{2} \sum_k^{\text{occ}} \sum_l^{\text{occ}} S_{kl}^b A_{ij,kl} \right] \\
&\quad - \sum_{i,j}^{\text{occ}} \sum_{\lambda,\sigma} 2 S_{ij}^a C_{\lambda i} C_{\sigma j} \frac{\partial W_{\lambda\sigma}}{\partial b} + \frac{\partial (V_{\text{NR}}^a)}{\partial b} + \sum_{\mu,\nu} D_{\mu\nu} \frac{\partial W_{\mu\nu}^a}{\partial b} + \frac{1}{2} \sum_{t,s}^{N_{\text{TS}}} \frac{\partial}{\partial b} \left( q_t \frac{\partial C_{ts}}{\partial a} q_s \right). \tag{15}
\end{aligned}$$

The last three terms can be expanded further

$$\begin{aligned}
\frac{\partial^2 E}{\partial a \partial b} = & \sum_i^{\text{occ}} \left[ h_{ii}^{ab} + F_{ii}^{ab} + W_{ii}^{ab} - S_{ii}^{ab} \epsilon_i \right] + E_{\text{NR}}^{ab} + \sum_i^{\text{occ}} \sum_j^{\text{occ}} 4S_{ij}^b S_{ij}^a \epsilon_i + \sum_t^{N_{\text{TS}}} \sum_A q_t \frac{\partial^2}{\partial a \partial b} \left( \frac{Z_A}{|\mathbf{R}_A - \mathbf{R}_t|} \right) \\
& + \sum_m^{\text{vir}} \sum_i^{\text{occ}} U_{mi}^b \left[ 4F_{mi}^a + 4W_{mi}^a - 4S_{mi}^a \epsilon_i - 2 \sum_k^{\text{occ}} \sum_l^{\text{occ}} S_{kl}^a A_{mi,kl} - 2 \sum_k^{\text{occ}} \sum_l^{\text{occ}} S_{kl}^a A_{mi,kl}^{\text{PCM}} \right] \\
& - \sum_i^{\text{occ}} \sum_j^{\text{occ}} S_{ij}^b \left[ 2F_{ij}^a + 2W_{ij}^a - \frac{1}{2} \sum_k^{\text{occ}} \sum_l^{\text{occ}} S_{kl}^b A_{ij,kl} - \frac{1}{2} \sum_k^{\text{occ}} \sum_l^{\text{occ}} S_{kl}^b A_{ij,kl}^{\text{PCM}} \right] \\
& - \sum_i^{\text{occ}} \sum_j^{\text{occ}} S_{ij}^a \left[ 2F_{ij}^b + 2W_{ij}^b - \frac{1}{2} \sum_k^{\text{occ}} \sum_l^{\text{occ}} S_{kl}^b A_{ij,kl} - \frac{1}{2} \sum_k^{\text{occ}} \sum_l^{\text{occ}} S_{kl}^b A_{ij,kl}^{\text{PCM}} \right] \\
& + 2 \sum_{i,j}^{\text{occ}} \sum_{t,s}^{N_{\text{TS}}} S_{ij}^a \left\langle i \left| \frac{-1}{|\mathbf{r} - \mathbf{R}_t|} \right| j \right\rangle C_{ts}^{-1} \left[ \sum_A \left( \frac{Z_A}{|\mathbf{R}_A - \mathbf{R}_s|} \right)^b + \sum_{\mu,\nu} D_{\mu\nu} \left\langle \mu \left| \frac{-1}{|\mathbf{r} - \mathbf{R}_s|} \right| \nu \right\rangle^b \right] \\
& - 4 \sum_m^{\text{all}} \sum_i^{\text{occ}} \sum_{t,s}^{N_{\text{TS}}} U_{mi}^b \left\langle m \left| \frac{-1}{|\mathbf{r} - \mathbf{R}_s|} \right| i \right\rangle C_{ts}^{-1} \left[ \sum_A \left( \frac{Z_A}{|\mathbf{R}_A - \mathbf{R}_t|} \right)^a + \sum_{\mu,\nu} D_{\mu\nu} \left\langle \mu \left| \frac{-1}{|\mathbf{r} - \mathbf{R}_t|} \right| \nu \right\rangle^a \right] \\
& - \sum_{t,s}^{N_{\text{TS}}} \sum_A \frac{\partial}{\partial a} \left( \frac{Z_A}{|\mathbf{R}_A - \mathbf{R}_t|} \right) C_{ts}^{-1} \left[ \sum_{\mu,\nu} D_{\mu\nu} \left\langle \mu \left| \frac{-1}{|\mathbf{r} - \mathbf{R}_s|} \right| \nu \right\rangle^b + \sum_B \frac{\partial}{\partial b} \left( \frac{Z_B}{|\mathbf{R}_B - \mathbf{R}_t|} \right) \right] \\
& - \sum_{t,s}^{N_{\text{TS}}} \sum_{\mu,\nu} C_{ts}^{-1} D_{\mu\nu} \left\langle \mu \left| \frac{-1}{|\mathbf{r} - \mathbf{R}_t|} \right| \nu \right\rangle^a \left[ \sum_{\lambda,\sigma} D_{\lambda\sigma} \left\langle \lambda \left| \frac{-1}{|\mathbf{r} - \mathbf{R}_s|} \right| \sigma \right\rangle^b + \sum_B \frac{\partial}{\partial b} \left( \frac{Z_B}{|\mathbf{R}_B - \mathbf{R}_t|} \right) \right] \\
& - \sum_{s,t,u}^{N_{\text{TS}}} q_s \frac{\partial C_{su}}{\partial b} C_{ut}^{-1} \left[ \frac{\partial}{\partial a} \left( \frac{Z_A}{|\mathbf{R}_A - \mathbf{R}_t|} \right) + \sum_{\mu,\nu} D_{\mu\nu} \left\langle \mu \left| \frac{-1}{|\mathbf{r} - \mathbf{R}_t|} \right| \nu \right\rangle^a \right] \\
& + 2 \sum_{i,j}^{\text{occ}} \sum_{s,t,u}^{N_{\text{TS}}} S_{ij}^a q_s \frac{\partial C_{su}}{\partial b} C_{ut}^{-1} \left\langle i \left| \frac{-1}{|\mathbf{r} - \mathbf{R}_t|} \right| j \right\rangle + \frac{1}{2} \sum_{t,s}^{N_{\text{TS}}} \frac{\partial}{\partial b} \left( q_t \frac{\partial C_{ts}}{\partial a} q_s \right). \tag{16}
\end{aligned}$$

Defining

$$V_t^a = \sum_A \frac{\partial}{\partial a} \left( \frac{Z_A}{|\mathbf{R}_A - \mathbf{R}_t|} \right) + \sum_{\mu,\nu} D_{\mu\nu} \left\langle \mu \left| \frac{-1}{|\mathbf{r} - \mathbf{R}_t|} \right| \nu \right\rangle^a, \tag{17}$$

Eq. 16 can be converted to

$$\begin{aligned}
\frac{\partial^2 E}{\partial a \partial b} &= \sum_i^{\text{occ}} \left[ h_{ii}^{ab} + F_{ii}^{ab} + W_{ii}^{ab} - S_{ii}^{ab} \epsilon_i \right] + E_{\text{NR}}^{ab} + \sum_i^{\text{occ}} \sum_j^{\text{occ}} 4S_{ij}^b S_{ij}^a \epsilon_i + \sum_t^{N_{\text{TS}}} \sum_A q_t \frac{\partial^2}{\partial a \partial b} \left( \frac{Z_A}{|\mathbf{R}_A - \mathbf{R}_t|} \right) \\
&+ \sum_m^{\text{vir}} \sum_i^{\text{occ}} U_{mi}^b \left[ 4F_{mi}^a + 4W_{mi}^a - 4S_{mi}^a \epsilon_i - 2 \sum_k^{\text{occ}} \sum_l^{\text{occ}} S_{kl}^a A_{mi,kl} \right. \\
&- 2 \sum_k^{\text{occ}} \sum_l^{\text{occ}} S_{kl}^a A_{mi,kl}^{\text{PCM}} - 4 \sum_{t,s}^{N_{\text{TS}}} \left\langle m \left| \frac{-1}{|\mathbf{r} - \mathbf{R}_s|} \right| i \right\rangle C_{ts}^{-1} V_s^a \left. \right] - \sum_{t,s}^{N_{\text{TS}}} C_{ts}^{-1} V_t^a V_s^b \\
&- \sum_i^{\text{occ}} \sum_j^{\text{occ}} S_{ij}^b \left[ 2F_{ij}^a + 2W_{ij}^a - \frac{1}{2} \sum_k^{\text{occ}} \sum_l^{\text{occ}} S_{kl}^a A_{ij,kl} - \frac{1}{2} \sum_k^{\text{occ}} \sum_l^{\text{occ}} S_{kl}^a A_{ij,kl}^{\text{PCM}} - 2 \sum_{t,s}^{N_{\text{TS}}} \left\langle i \left| \frac{-1}{|\mathbf{r} - \mathbf{R}_t|} \right| j \right\rangle C_{ts}^{-1} V_s^a \right] \\
&- \sum_i^{\text{occ}} \sum_j^{\text{occ}} S_{ij}^a \left[ 2F_{ij}^b + 2W_{ij}^b - \frac{1}{2} \sum_k^{\text{occ}} \sum_l^{\text{occ}} S_{kl}^b A_{ij,kl} - \frac{1}{2} \sum_k^{\text{occ}} \sum_l^{\text{occ}} S_{kl}^b A_{ij,kl}^{\text{PCM}} - 2 \sum_{t,s}^{N_{\text{TS}}} \left\langle i \left| \frac{-1}{|\mathbf{r} - \mathbf{R}_t|} \right| j \right\rangle C_{ts}^{-1} V_s^b \right] \\
&- \sum_{s,t,u}^{N_{\text{TS}}} q_s \frac{\partial C_{su}}{\partial b} C_{ut}^{-1} V_t^a + 2 \sum_{i,j}^{\text{occ}} \sum_{s,t,u}^{N_{\text{TS}}} S_{ij}^a q_s \frac{\partial C_{su}}{\partial b} C_{ut}^{-1} \left\langle i \left| \frac{-1}{|\mathbf{r} - \mathbf{R}_t|} \right| j \right\rangle + \frac{1}{2} \sum_{t,s}^{N_{\text{TS}}} \frac{\partial}{\partial b} \left( q_t \frac{\partial C_{ts}}{\partial a} q_s \right). \tag{18}
\end{aligned}$$

The remaining term is

$$\begin{aligned}
\frac{1}{2} \sum_{t,s}^{N_{\text{TS}}} \frac{\partial}{\partial b} \left( q_t \frac{\partial C_{ts}}{\partial a} q_s \right) &= \sum_{t,s}^{N_{\text{TS}}} \frac{\partial q_t}{\partial b} \frac{\partial C_{ts}}{\partial a} q_s + \frac{1}{2} \sum_{t,s}^{N_{\text{TS}}} q_t \frac{\partial^2 C_{ts}}{\partial a \partial b} q_s \\
&= - \sum_{s,t,u}^{N_{\text{TS}}} V_u \frac{\partial C_{ut}^{-1}}{\partial b} \frac{\partial C_{ts}}{\partial a} q_s - \sum_{s,t,u}^{N_{\text{TS}}} V_u^b C_{ut}^{-1} \frac{\partial C_{ts}}{\partial a} q_s \\
&- \sum_{s,t,u}^{N_{\text{TS}}} \sum_m^{\text{all}} \sum_i^{\text{occ}} 4U_{mi}^b \left\langle m \left| \frac{-1}{|\mathbf{r} - \mathbf{R}_u|} \right| i \right\rangle C_{ut}^{-1} \frac{\partial C_{ts}}{\partial a} q_s + \frac{1}{2} \sum_{t,s}^{N_{\text{TS}}} q_t \frac{\partial^2 C_{ts}}{\partial a \partial b} q_s \\
&= - \sum_{s,t,u,v}^{N_{\text{TS}}} q_v \frac{\partial C_{vu}}{\partial b} C_{ut}^{-1} \frac{\partial C_{ts}}{\partial a} q_s - \sum_{s,t,u}^{N_{\text{TS}}} V_u^b C_{ut}^{-1} \frac{\partial C_{ts}}{\partial a} q_s \\
&- \sum_{s,t,u}^{N_{\text{TS}}} \sum_m^{\text{all}} \sum_i^{\text{occ}} 4U_{mi}^b \left\langle m \left| \frac{-1}{|\mathbf{r} - \mathbf{R}_u|} \right| i \right\rangle C_{ut}^{-1} \frac{\partial C_{ts}}{\partial a} q_s + \frac{1}{2} \sum_{t,s}^{N_{\text{TS}}} q_t \frac{\partial^2 C_{ts}}{\partial a \partial b} q_s. \tag{19}
\end{aligned}$$

Finally, one obtains

$$\begin{aligned}
\frac{\partial^2 E}{\partial a \partial b} = & \sum_i^{\text{occ}} \left[ h_{ii}^{ab} + F_{ii}^{ab} + W_{ii}^{ab} - S_{ii}^{ab} \epsilon_i \right] + E_{\text{NR}}^{ab} + \sum_i^{\text{occ}} \sum_j^{\text{occ}} 4 S_{ij}^b S_{ij}^a \epsilon_i + \sum_t^{N_{\text{TS}}} \sum_A q_t \frac{\partial^2}{\partial a \partial b} \left( \frac{Z_A}{|\mathbf{R}_A - \mathbf{R}_t|} \right) \\
& + \sum_m^{\text{vir}} \sum_i^{\text{occ}} U_{mi}^b \left[ 4 F_{mi}^a + 4 W_{mi}^a - 4 S_{mi}^a \epsilon_i - 2 \sum_k^{\text{occ}} \sum_l^{\text{occ}} S_{kl}^a A_{mi,kl} - 2 \sum_k^{\text{occ}} \sum_l^{\text{occ}} S_{kl}^a A_{mi,kl}^{\text{PCM}} \right. \\
& - \sum_{s,t,u}^{N_{\text{TS}}} 4 \left\langle m \left| \frac{-1}{|\mathbf{r} - \mathbf{R}_u|} \right| i \right\rangle C_{ut}^{-1} \frac{\partial C_{ts}}{\partial a} q_s - 4 \sum_{t,s}^{N_{\text{TS}}} \left\langle m \left| \frac{-1}{|\mathbf{r} - \mathbf{R}_t|} \right| i \right\rangle C_{ts}^{-1} V_s^a \left. \right] \\
& - \sum_i^{\text{occ}} \sum_j^{\text{occ}} S_{ij}^b \left[ 2 F_{ij}^a + 2 W_{ij}^a - \frac{1}{2} \sum_k^{\text{occ}} \sum_l^{\text{occ}} S_{kl}^a A_{ij,kl} - \frac{1}{2} \sum_k^{\text{occ}} \sum_l^{\text{occ}} S_{kl}^a A_{ij,kl}^{\text{PCM}} \right. \\
& - \sum_{s,t,u}^{N_{\text{TS}}} 2 \left\langle i \left| \frac{-1}{|\mathbf{r} - \mathbf{R}_u|} \right| j \right\rangle C_{ut}^{-1} \frac{\partial C_{ts}}{\partial a} q_s - 2 \sum_{t,s}^{N_{\text{TS}}} \left\langle i \left| \frac{-1}{|\mathbf{r} - \mathbf{R}_t|} \right| j \right\rangle C_{ts}^{-1} V_s^a \left. \right] \\
& - \sum_i^{\text{occ}} \sum_j^{\text{occ}} S_{ij}^a \left[ 2 F_{ij}^b + 2 W_{ij}^b - \frac{1}{2} \sum_k^{\text{occ}} \sum_l^{\text{occ}} S_{kl}^b A_{ij,kl} - \frac{1}{2} \sum_k^{\text{occ}} \sum_l^{\text{occ}} S_{kl}^b A_{ij,kl}^{\text{PCM}} \right. \\
& - 2 \sum_{s,t,u}^{N_{\text{TS}}} \left\langle i \left| \frac{-1}{|\mathbf{r} - \mathbf{R}_u|} \right| j \right\rangle C_{ut}^{-1} \frac{\partial C_{ts}}{\partial b} q_s - 2 \sum_{t,s}^{N_{\text{TS}}} \left\langle i \left| \frac{-1}{|\mathbf{r} - \mathbf{R}_t|} \right| j \right\rangle C_{ts}^{-1} V_s^b \left. \right] \\
& - \sum_{t,u}^{N_{\text{TS}}} \left[ \sum_v^{N_{\text{TS}}} q_v \frac{\partial C_{vu}}{\partial b} + V_u^b \right] C_{ut}^{-1} \left[ V_t^a + \sum_s^{N_{\text{TS}}} \frac{\partial C_{ts}}{\partial a} q_s \right] + \frac{1}{2} \sum_{t,s}^{N_{\text{TS}}} q_t \frac{\partial^2 C_{ts}}{\partial a \partial b} q_s. \tag{20}
\end{aligned}$$

## 4 CPHF equations

The Fock matrix is

$$\tilde{F}_{ij} = h_{ij} + \sum_k^{\text{occ}} \{ 2(ij|kk) - (ik|jk) \} + W_{ij} \tag{21}$$

$$W_{ij} = \sum_t^{N_{\text{TS}}} \left\langle i \left| \frac{-q_t}{|\mathbf{r} - \mathbf{R}_t|} \right| j \right\rangle. \tag{22}$$

Therefore, the derivative of the Fock matrix is

$$\frac{\partial \tilde{F}_{ij}}{\partial a} = \sum_m^{\text{all}} U_{mi}^a F_{jm} + \sum_m^{\text{all}} U_{mj}^a F_{im} + F_{ij}^a + \sum_m^{\text{all}} \sum_l^{\text{occ}} U_{ml}^a A_{ij,ml} + \frac{\partial W_{ij}}{\partial a} \tag{23}$$

$$\frac{\partial W_{ij}}{\partial a} = \sum_m^{\text{all}} U_{mi}^a W_{jm} + \sum_m^{\text{all}} U_{mj}^a W_{im} + \sum_t^{N_{\text{TS}}} \left\langle i \left| \frac{-q_t}{|\mathbf{r} - \mathbf{R}_t|} \right| j \right\rangle^a + \sum_t^{N_{\text{TS}}} \frac{\partial q_t}{\partial a} \left\langle i \left| \frac{-1}{|\mathbf{r} - \mathbf{R}_t|} \right| j \right\rangle. \tag{24}$$

Eq. 24 can be expanded to

$$\begin{aligned}
\frac{\partial W_{ij}}{\partial a} &= \sum_m^{\text{all}} U_{mi}^a W_{jm} + \sum_m^{\text{all}} U_{mj}^a W_{im} + \sum_t^{N_{\text{TS}}} \left\langle i \left| \frac{-q_t}{|\mathbf{r} - \mathbf{R}_t|} \right| j \right\rangle^a \\
&\quad - \sum_t^{N_{\text{TS}}} \sum_I^N \frac{\partial}{\partial a} (\mathbf{C}^{-1} \mathbf{V}^I)_t \left\langle i \left| \frac{-1}{|\mathbf{r} - \mathbf{R}_t|} \right| j \right\rangle \\
&= \sum_m^{\text{all}} U_{mi}^{a,X} W_{jm}^X + \sum_m^{\text{all}} U_{mj}^{a,X} W_{im}^X + \sum_t^{N_{\text{TS}}} \left\langle i \left| \frac{-q_t}{|\mathbf{r} - \mathbf{R}_t|} \right| j \right\rangle^a \\
&\quad - \sum_t^{N_{\text{TS}}} \sum_I^N \left( \mathbf{C}^{-1} \frac{\partial \mathbf{V}^I}{\partial a} \right)_t \left\langle i \left| \frac{-1}{|\mathbf{r} - \mathbf{R}_t|} \right| j \right\rangle - \sum_{s,t,u}^{N_{\text{TS}}} \left\langle i \left| \frac{-1}{|\mathbf{r} - \mathbf{R}_u|} \right| j \right\rangle C_{ut}^{-1} \frac{\partial C_{ts}}{\partial a} q_s.
\end{aligned} \tag{25}$$

Therefore,

$$\begin{aligned}
\frac{\partial W_{ij}}{\partial a} &= \sum_m^{\text{all}} U_{mi}^a W_{jm} + \sum_m^{\text{all}} U_{mj}^a W_{im} + \sum_t^{N_{\text{TS}}} \left\langle i \left| \frac{-q_t}{|\mathbf{r} - \mathbf{R}_t|} \right| j \right\rangle^a \\
&\quad + \sum_t^{N_{\text{TS}}} \frac{\partial V_t}{\partial a} q_t^{ij} - \sum_{s,t,u}^{N_{\text{TS}}} \left\langle i \left| \frac{-1}{|\mathbf{r} - \mathbf{R}_u|} \right| j \right\rangle C_{ut}^{-1} \frac{\partial C_{ts}}{\partial a} q_s
\end{aligned} \tag{26}$$

$$q_t^{ij} = - \sum_s^{N_{\text{TS}}} (\mathbf{C}^{-1})_{ts} \left\langle i \left| \frac{-1}{|\mathbf{r} - \mathbf{R}_s|} \right| j \right\rangle \tag{27}$$

$$\frac{\partial V_t}{\partial a} = \sum_A \frac{\partial}{\partial a} \left( \frac{Z_A}{|\mathbf{R}_A - \mathbf{R}_t|} \right) + \sum_{\mu,\nu} D^I_{\mu\nu} \left\langle \mu \left| \frac{-1}{|\mathbf{r} - \mathbf{R}_t|} \right| \nu \right\rangle^a + \sum_k^{\text{all}} \sum_l^{\text{occ}} 4U_{kl}^{a,I} \left\langle k \left| \frac{-1}{|\mathbf{r} - \mathbf{R}_t|} \right| l \right\rangle. \tag{28}$$

Eq. 23 can be converted to

$$\begin{aligned}
\frac{\partial \tilde{F}_{ij}}{\partial a} &= \sum_m^{\text{all}} U_{mi}^a \tilde{F}_{jm} + \sum_m^{\text{all}} U_{mj}^a \tilde{F}_{im} + \tilde{F}_{ij}^a + \sum_m^{\text{all}} \sum_l^{\text{occ}} U_{ml}^a A_{ij,ml} \\
&\quad + \sum_t^{N_{\text{TS}}} V_t^a q_t^{ij} - \sum_{s,t,u}^{N_{\text{TS}}} \left\langle i \left| \frac{-1}{|\mathbf{r} - \mathbf{R}_u|} \right| j \right\rangle C_{ut}^{-1} \frac{\partial C_{ts}}{\partial a} q_s + \sum_t^{N_{\text{TS}}} \sum_k^{\text{all}} \sum_l^{\text{occ}} 4U_{kl}^a \left\langle k \left| \frac{-1}{|\mathbf{r} - \mathbf{R}_t|} \right| l \right\rangle q_t^{ij}
\end{aligned} \tag{29}$$

Using the relationship  $\partial F_{ij}/\partial a = 0$ , CPHF equations are obtained:

$$\begin{aligned}
&-U_{ij}^a (\epsilon_i - \epsilon_j) - \sum_m^{\text{vir}} \sum_l^{\text{occ}} U_{ml}^a A_{ij,ml} - \sum_t^{N_{\text{TS}}} \sum_k^{\text{vir}} \sum_l^{\text{occ}} 4U_{kl}^{a,I} \left\langle k \left| \frac{-1}{|\mathbf{r} - \mathbf{R}_t|} \right| l \right\rangle q_t^{ij} \\
&= -S_{ij}^a \epsilon_j^X + \tilde{F}_{ij}^a - \frac{1}{2} \sum_k^{\text{all}} \sum_l^{\text{occ}} S_{kl}^a A_{ij,kl} + \sum_t^{N_{\text{TS}}} \sum_k^{\text{occ}} \sum_l^{\text{occ}} 2S_{kl}^a \left\langle k \left| \frac{-1}{|\mathbf{r} - \mathbf{R}_t|} \right| l \right\rangle q_t^{ij} \\
&\quad - \sum_{s,t,u}^{N_{\text{TS}}} \left\langle i \left| \frac{-1}{|\mathbf{r} - \mathbf{R}_u|} \right| j \right\rangle C_{ut}^{-1} \frac{\partial C_{ts}}{\partial a} q_s + \sum_t^{N_{\text{TS}}} V_t^a q_t^{ij}
\end{aligned} \tag{30}$$



## 5 Raman spectra for polyalanine

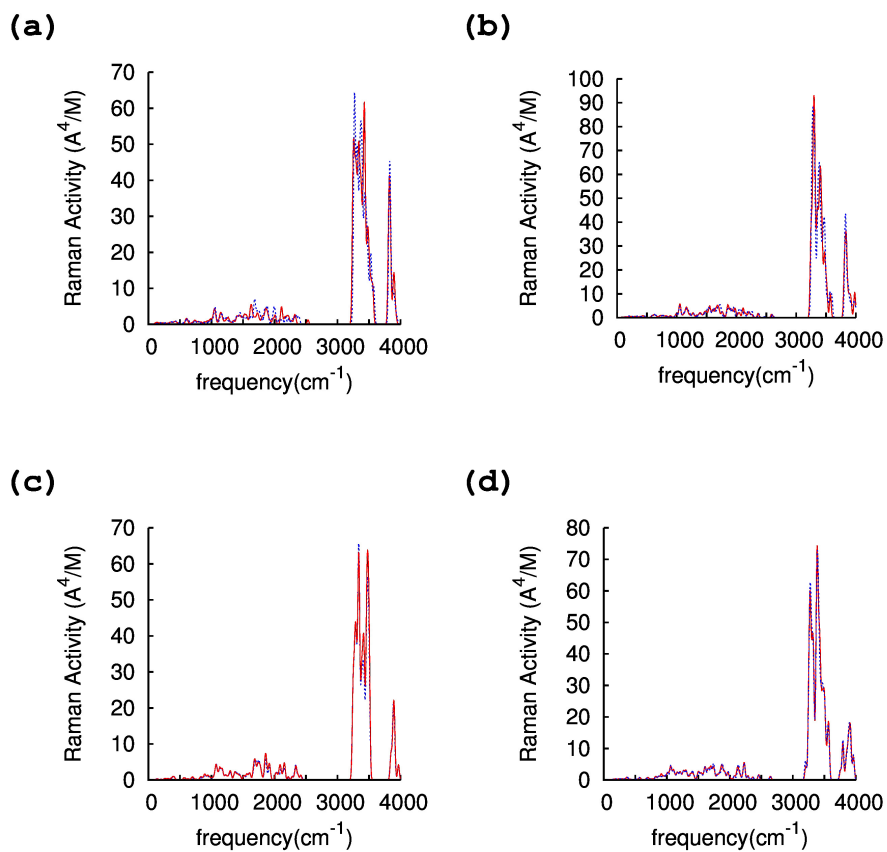

Figure 1: Raman spectra for the  $\alpha$ -helices and extended (e) forms of decapeptides (a)  $\alpha(\text{Ala})_{10}$ , (b)  $e(\text{Ala})_{10}$ , (c)  $\alpha(\text{Ala})_9(\text{Arg})$ , (d)  $e(\text{Ala})_9(\text{Arg})$ . FMO-PCM(1) and full unfragmented results are shown with red solid and blue dashed lines, respectively.

Table 1: Comparison of FMO-RHF/PCM and full RHF/PCM Raman peaks.

| method                             | FMO2      |           | full      |           |
|------------------------------------|-----------|-----------|-----------|-----------|
|                                    | frequency | intensity | frequency | intensity |
| $\alpha(\text{Ala})_{10}$          |           |           |           |           |
| peak1                              | 1631      | 5.528     | 1686      | 7.041     |
| peak2                              | 1865      | 4.458     | 1884      | 5.141     |
| peak3                              | 3259      | 51.767    | 3272      | 64.012    |
| peak4                              | 3339      | 50.821    | 3374      | 56.421    |
| peak5                              | 3427      | 61.370    | 3437      | 36.545    |
| peak6                              | 3826      | 41.375    | 3830      | 45.227    |
| $e(\text{Ala})_{10}$               |           |           |           |           |
| peak1                              | 1688      | 5.860     | 1698      | 5.669     |
| peak2                              | 1861      | 7.381     | 1861      | 5.583     |
| peak3                              | 3288      | 43.831    | 3288      | 43.857    |
| peak4                              | 3338      | 63.116    | 3338      | 65.521    |
| peak5                              | 3480      | 63.585    | 3479      | 56.445    |
| peak6                              | 3895      | 22.032    | 3892      | 21.600    |
| $\alpha(\text{Ala})_9(\text{Arg})$ |           |           |           |           |
| peak1                              | 1053      | 5.748     | 1050      | 4.788     |
| peak2                              | 1162      | 4.477     | 1175      | 4.027     |
| peak3                              | 1552      | 4.913     | 1532      | 4.291     |
| peak4                              | 1685      | 5.263     | 1618      | 4.170     |
| peak5                              | 1858      | 5.341     | 1865      | 4.125     |
| peak6                              | 3301      | 92.833    | 3282      | 87.988    |
| peak7                              | 3406      | 63.266    | 3390      | 64.876    |
| peak8                              | 3835      | 36.407    | 3828      | 43.274    |
| $e(\text{Ala})_9(\text{Arg})$      |           |           |           |           |
| peak1                              | 1698      | 4.465     | 1744      | 5.274     |
| peak2                              | 1874      | 4.865     | 1882      | 5.263     |
| peak3                              | 3318      | 46.630    | 3278      | 62.603    |
| peak4                              | 3388      | 74.148    | 3392      | 72.697    |
| peak5                              | 3795      | 11.658    | 3796      | 12.646    |

## 6 IR spectra for ionic liquid

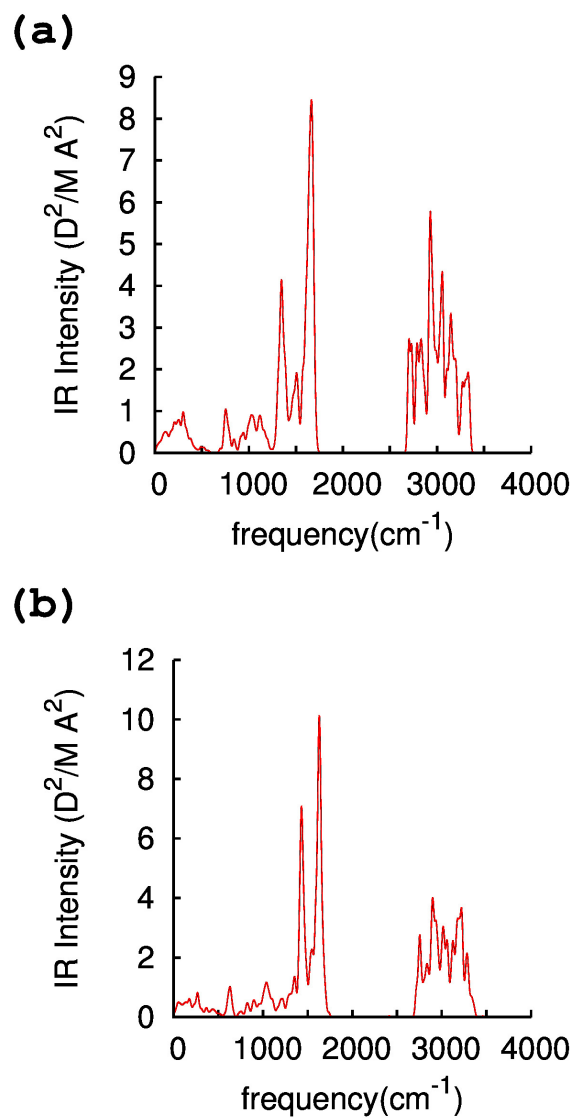

Figure 2: IR spectra for (a) DMEDAH, and (b) DMPDAH. The frequencies are scaled by 0.8953.

## References

- [1] M. Cossi and V. Barone, *J. Chem. Phys.* **109**, 6246 (1998).

## 7 Detailed accuracy of vibrational frequencies

**(a)  $\alpha$ -ALA (10)**

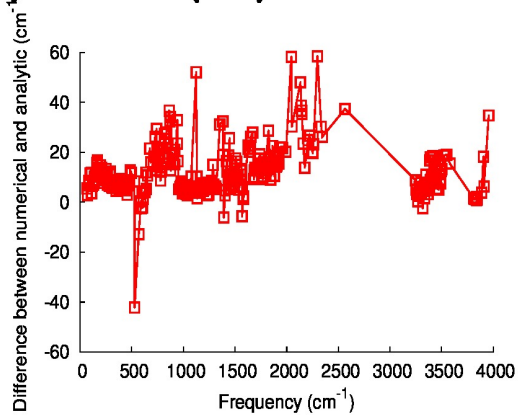

**(b)  $\alpha$ -ALA (9) ARG**

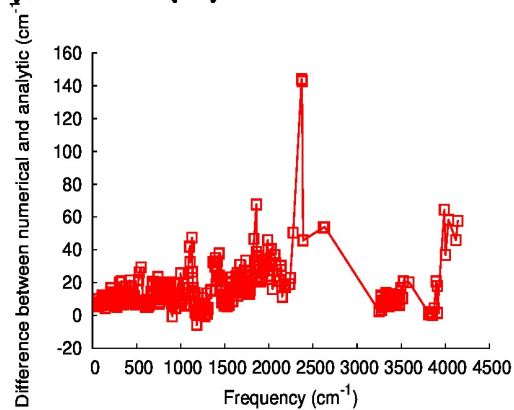

**(c) extend-ALA (10)**

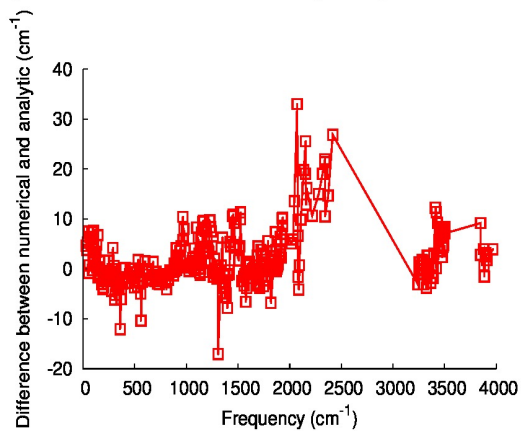

**(d) extend-ALA (9) ARG**

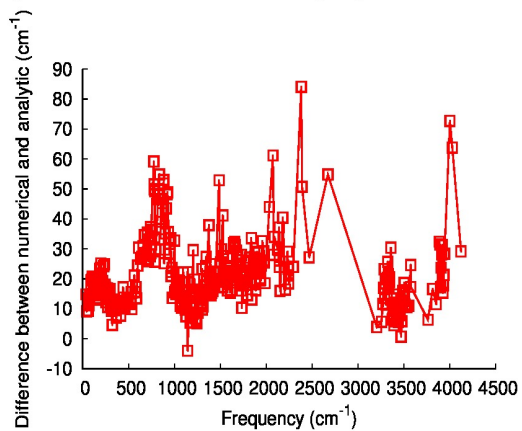

Figure 3: Differences of vibrational frequencies obtained with numerical and analytic FMO Hessians. (a)  $\alpha$ -(ala)10 (b)  $\alpha$ -arg (ala)9 (c)  $\beta$ -(ala)10 (d)  $\beta$ -arg (ala)9

**(a)  $\alpha$ -ALA (10)**

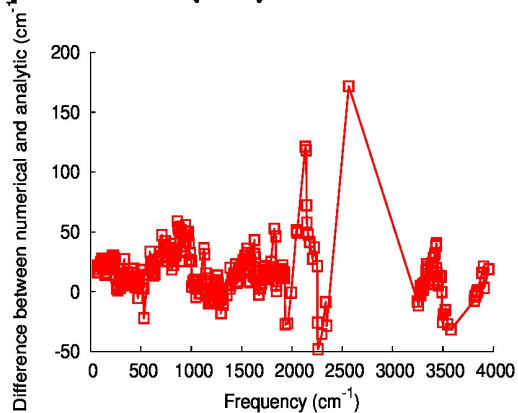

**(b)  $\alpha$ -ALA (9) ARG**

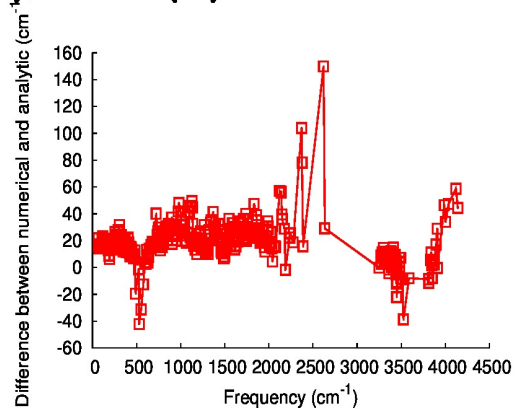

**(c) extend-ALA (10)**

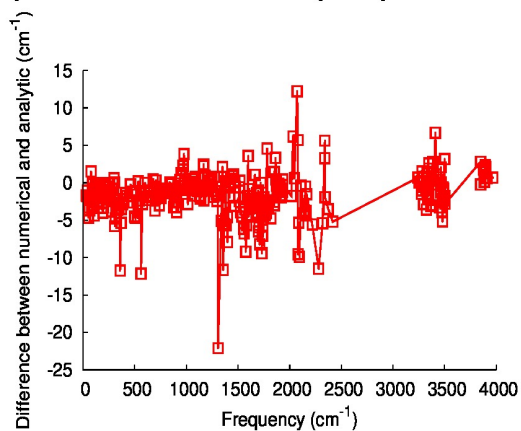

**(d) extend-ALA (9) ARG**

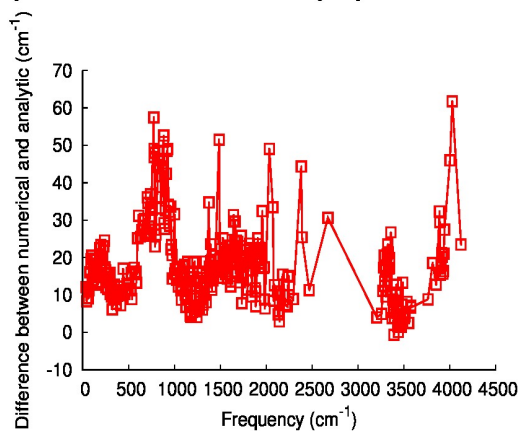

Figure 4: Differences of vibrational frequencies obtained with analytic Hessian without fragmentation and analytic FMO Hessians. (a)  $\alpha$ -(ala)10 (b)  $\alpha$ -arg (ala)9 (c)  $\beta$ -(ala)10 (d)  $\beta$ -arg (ala)9
